# Supplementary material for: Drug specificity and affinity are encoded in the probability of cryptic pocket opening in myosin motor domains
Source: eLife journal article supplement (doi:10.7554/elife.83602), 2023-01-27

Smooth Muscle Myosin

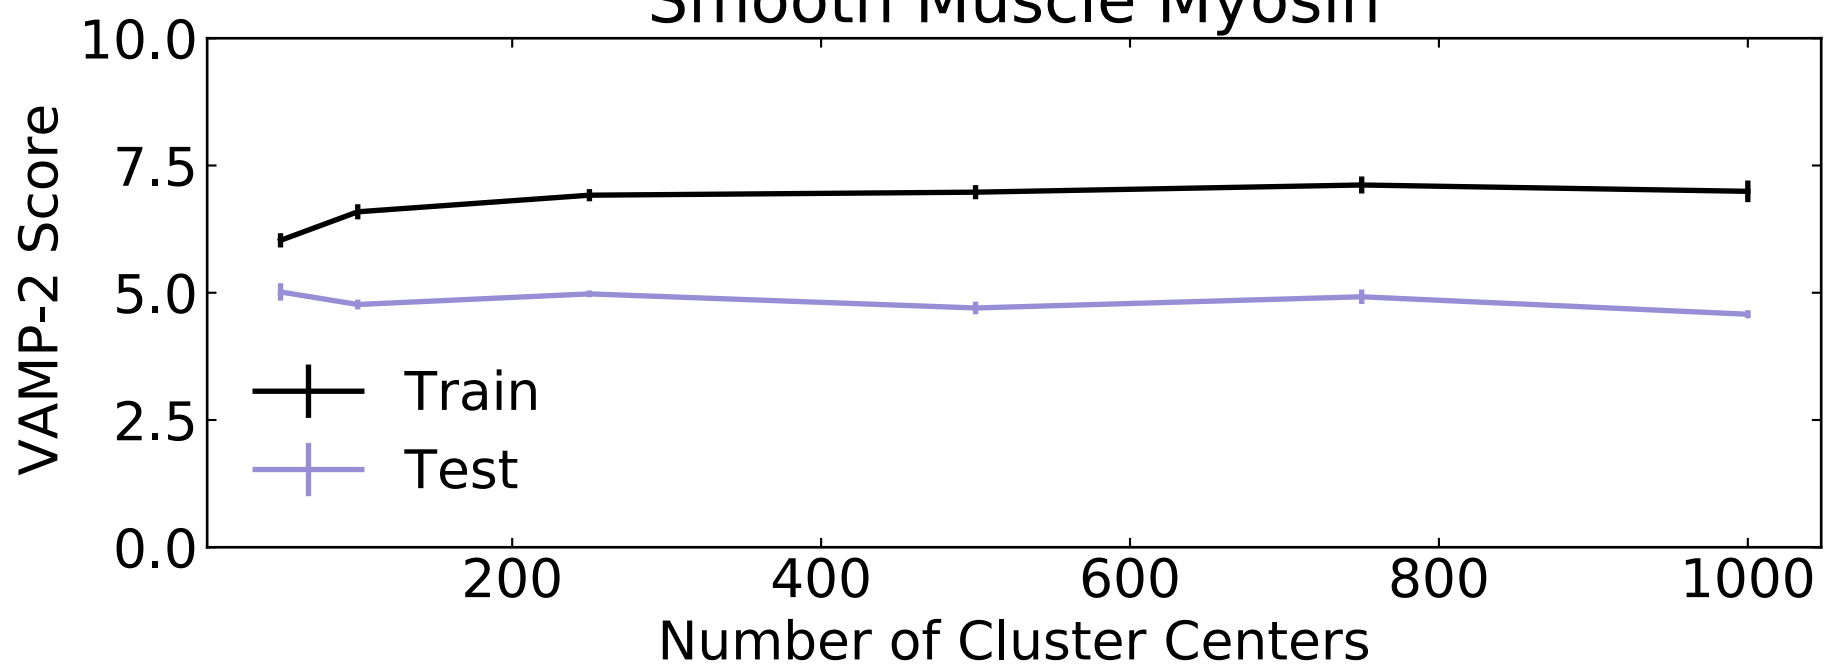

Skeletal Muscle Myosin IIA

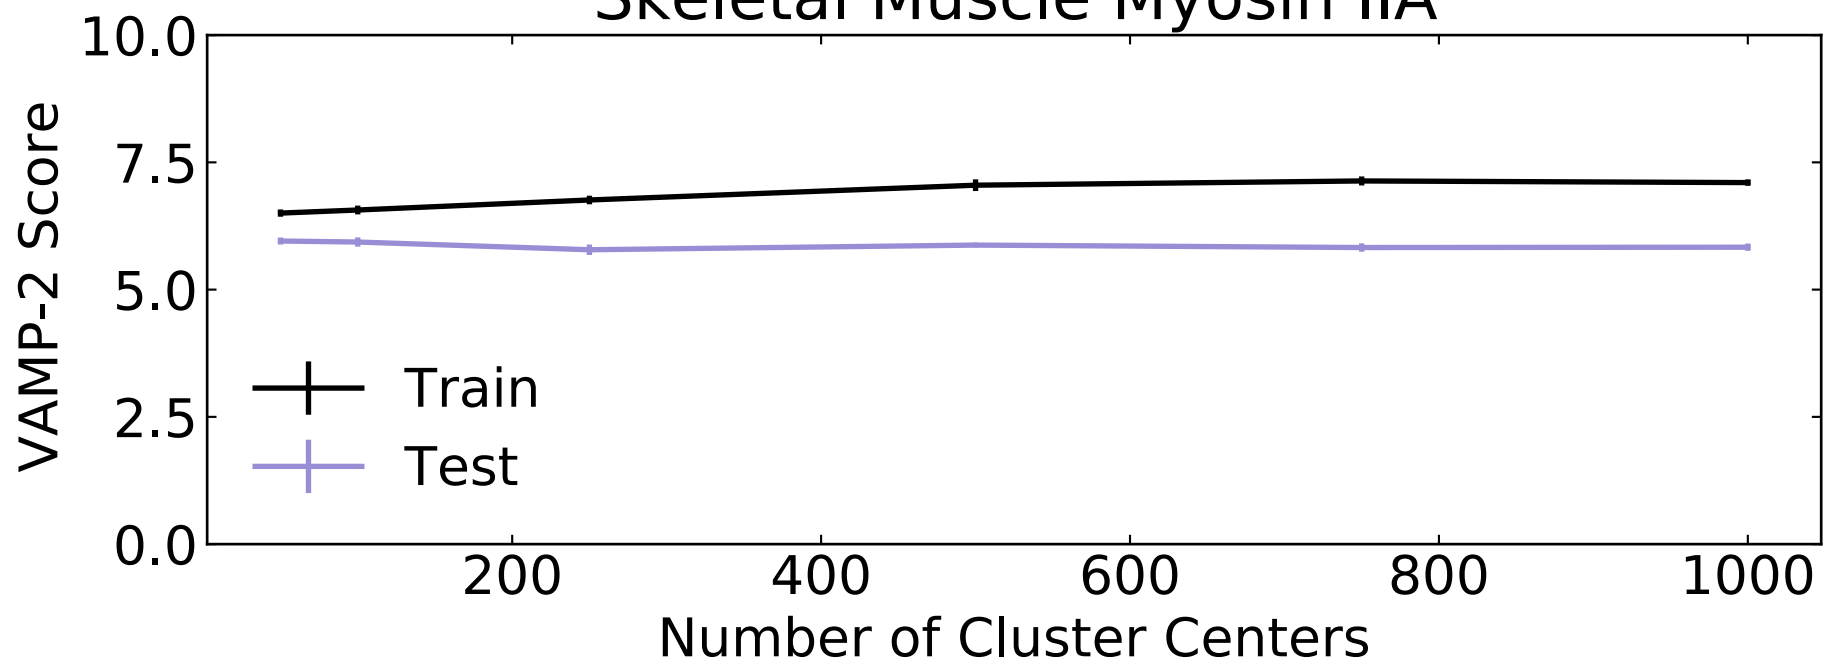 $\beta$ -Cardiac Myosin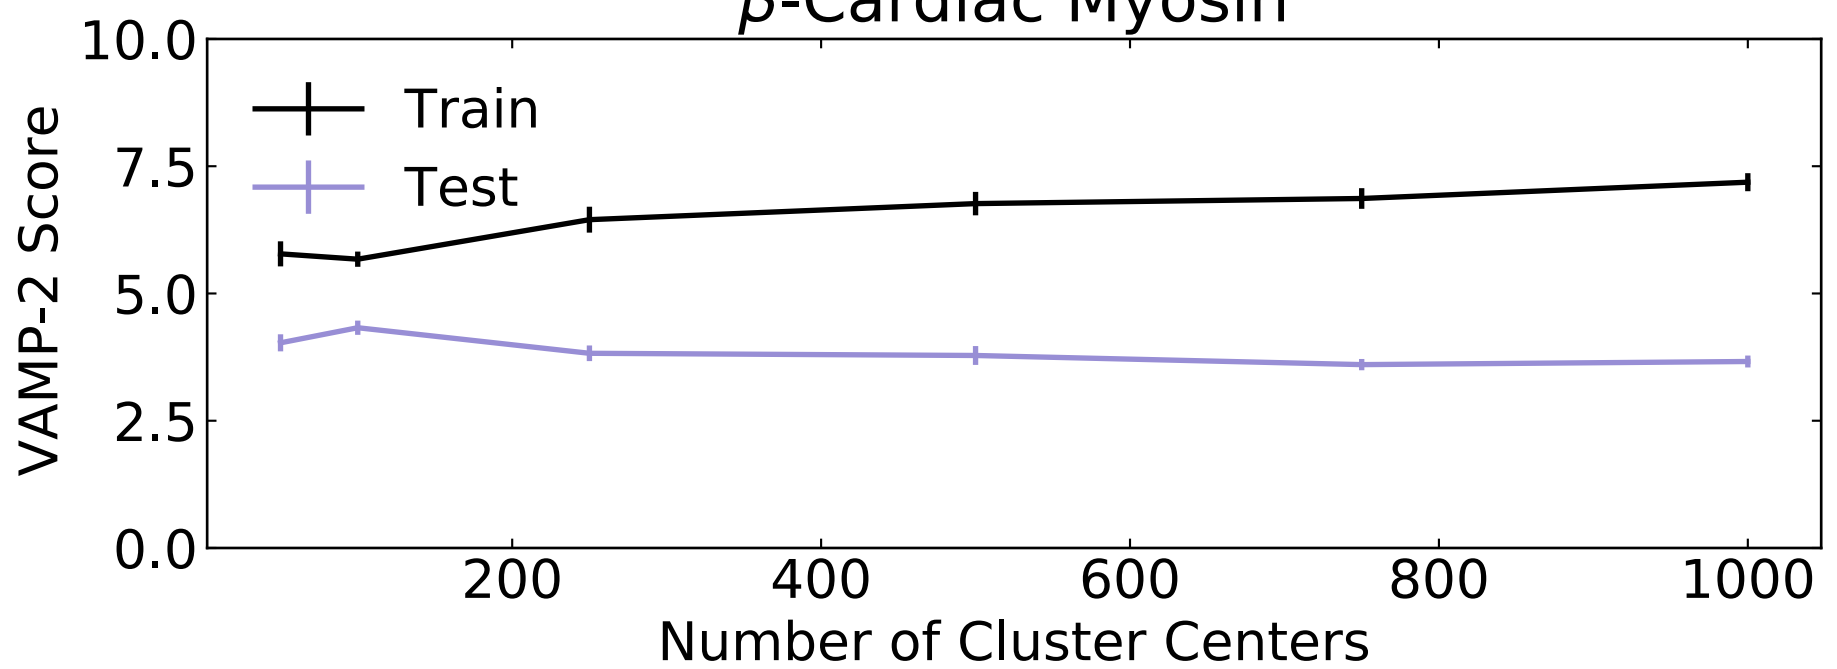

Nonmuscle Myosin IIA

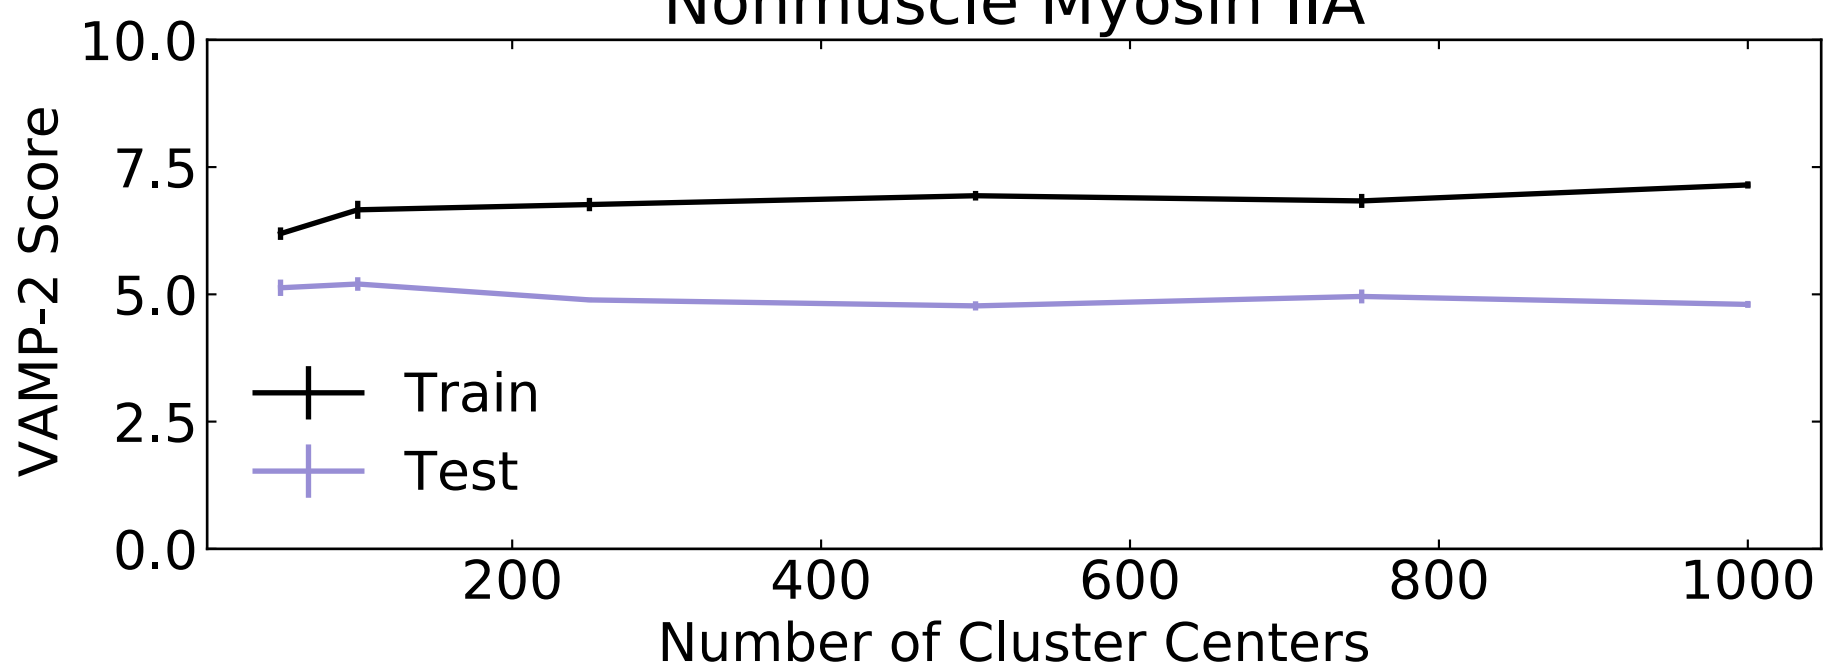

MYH7b

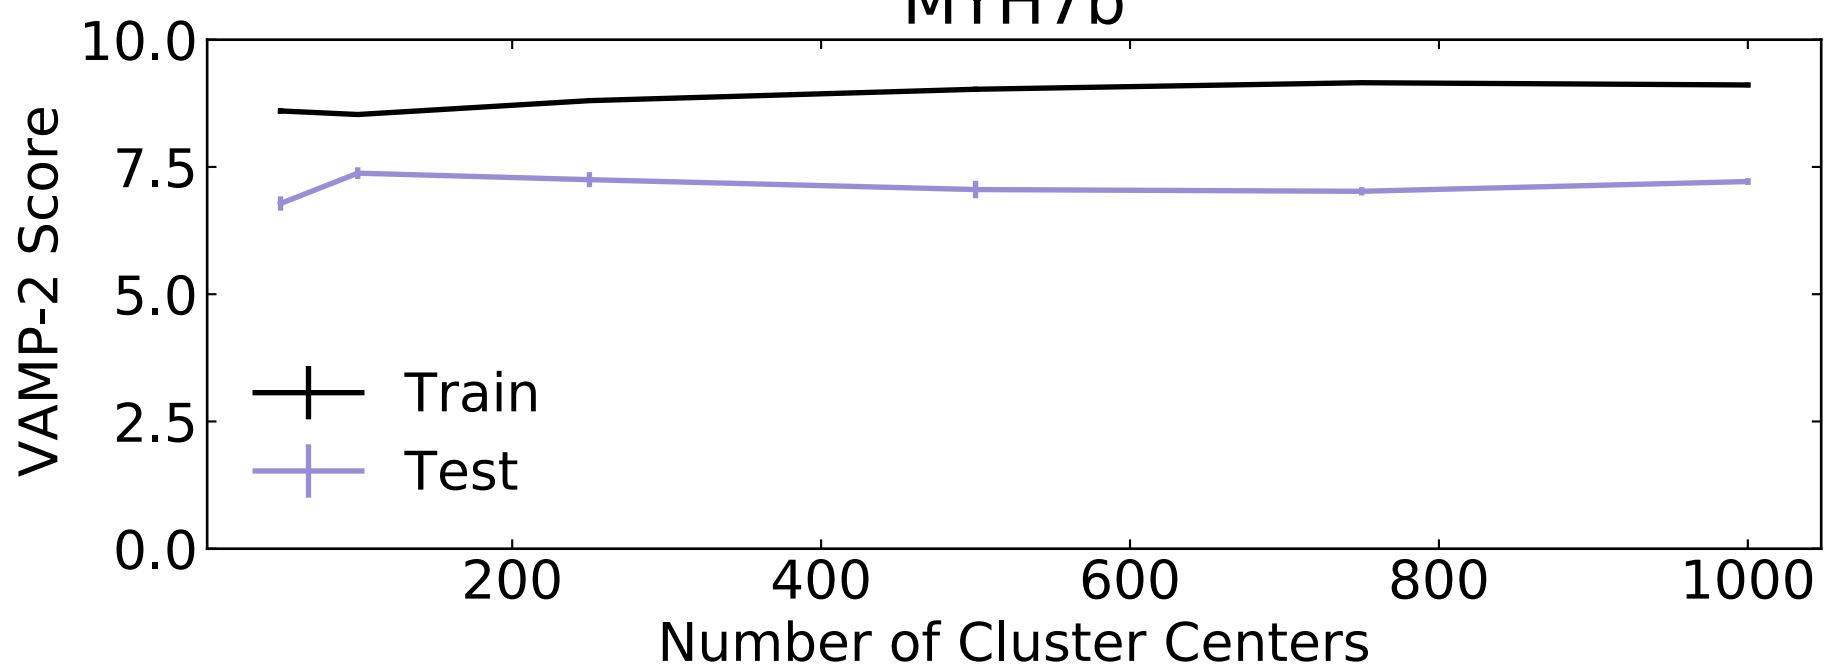

Supplement: supp [file elife-83602-supp-v1.zip]
