# Supplementary material for: Drug specificity and affinity are encoded in the probability of cryptic pocket opening in myosin motor domains
Source: eLife journal article supplement (doi:10.7554/elife.83602), 2023-01-27
Supplement: supp [file elife-83602-supp-v1.zip]

# Nucleotide Free

$\beta$ -Cardiac Myosin  
(IC<sub>50</sub>: 1.37  $\mu M$ )

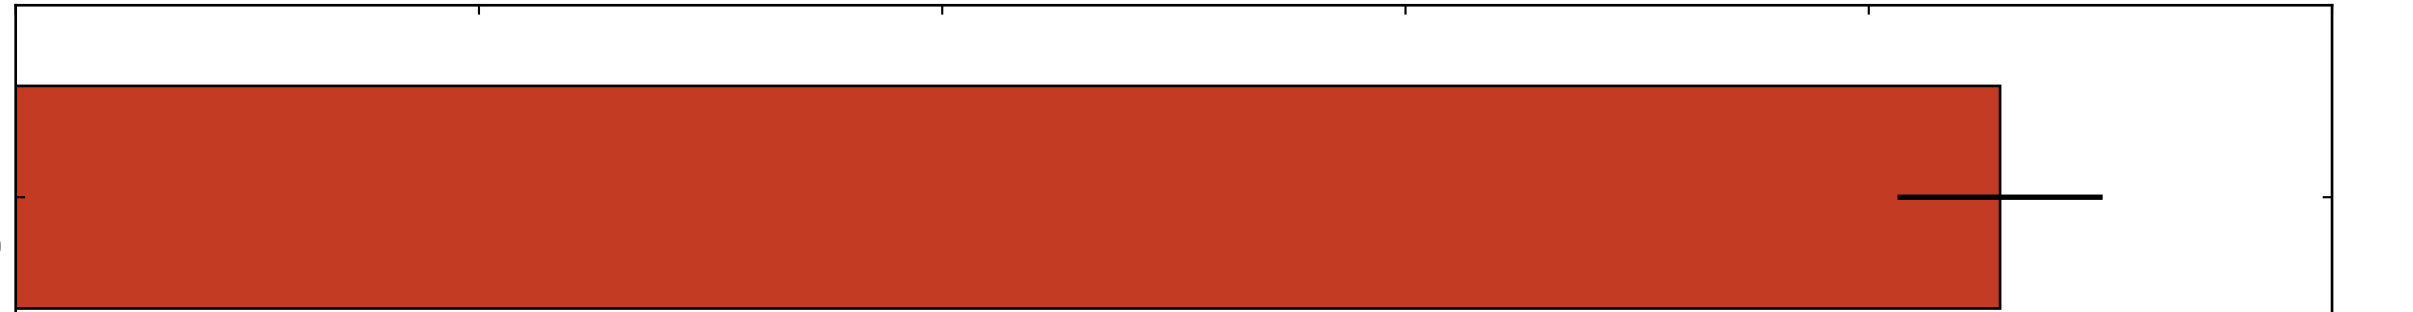

Nonmuscle Myosin IIB  
(2.05  $\mu M$ )

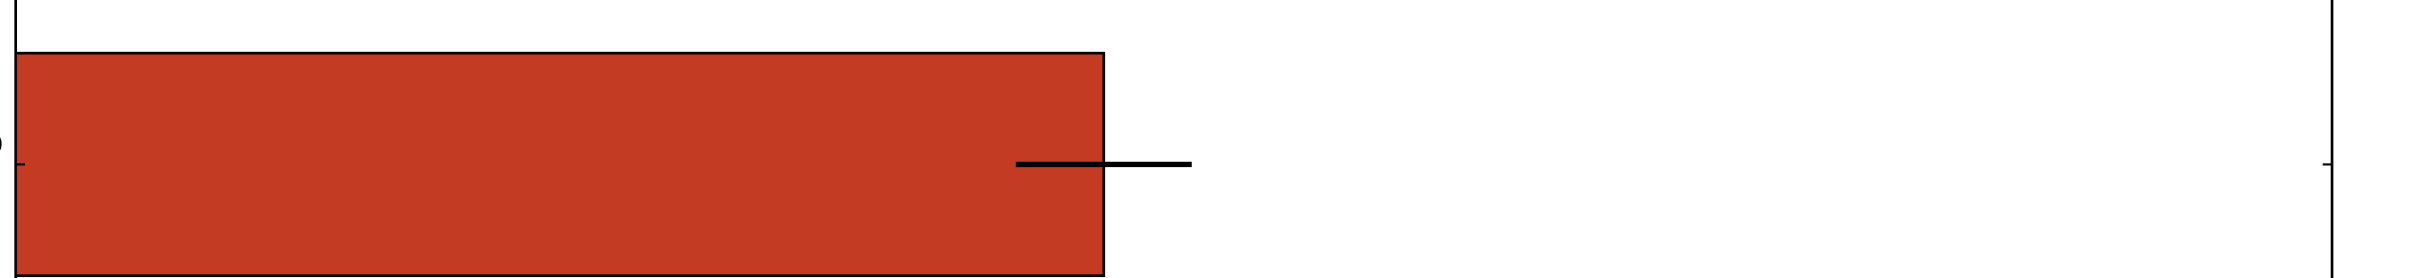

Smooth Muscle Myosin  
(28.19  $\mu M$ )

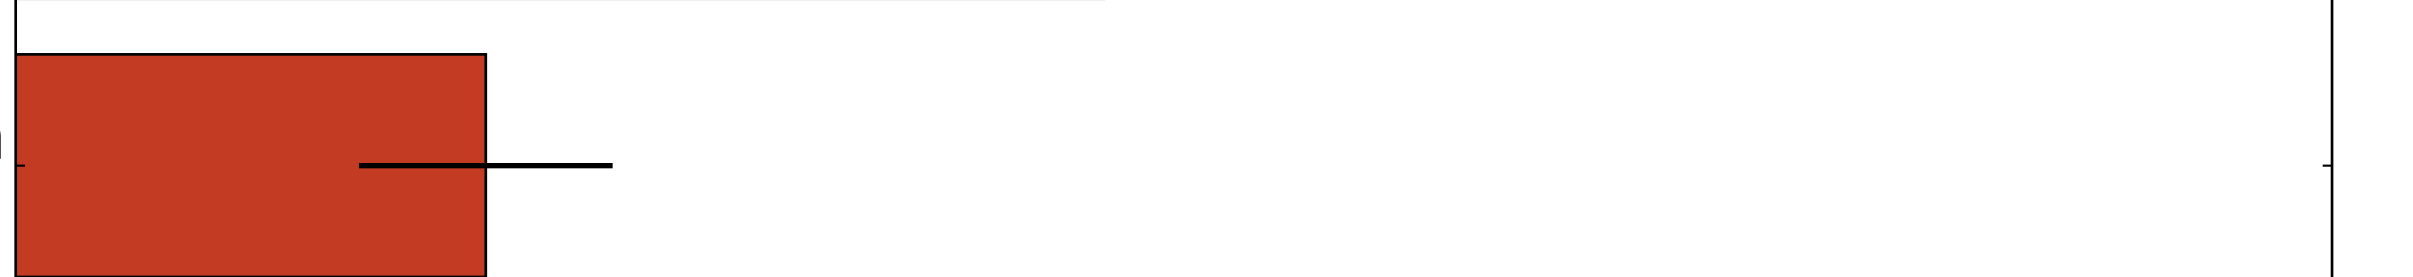

Myosin-X  
(>150  $\mu M$ )

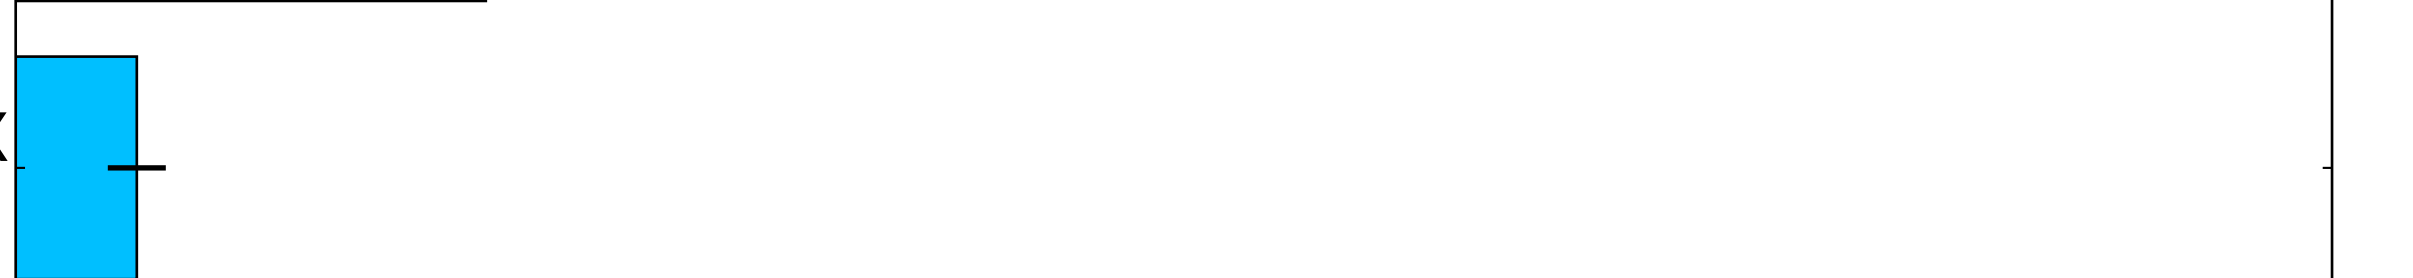

Myosin 1b  
(>150  $\mu M$ )

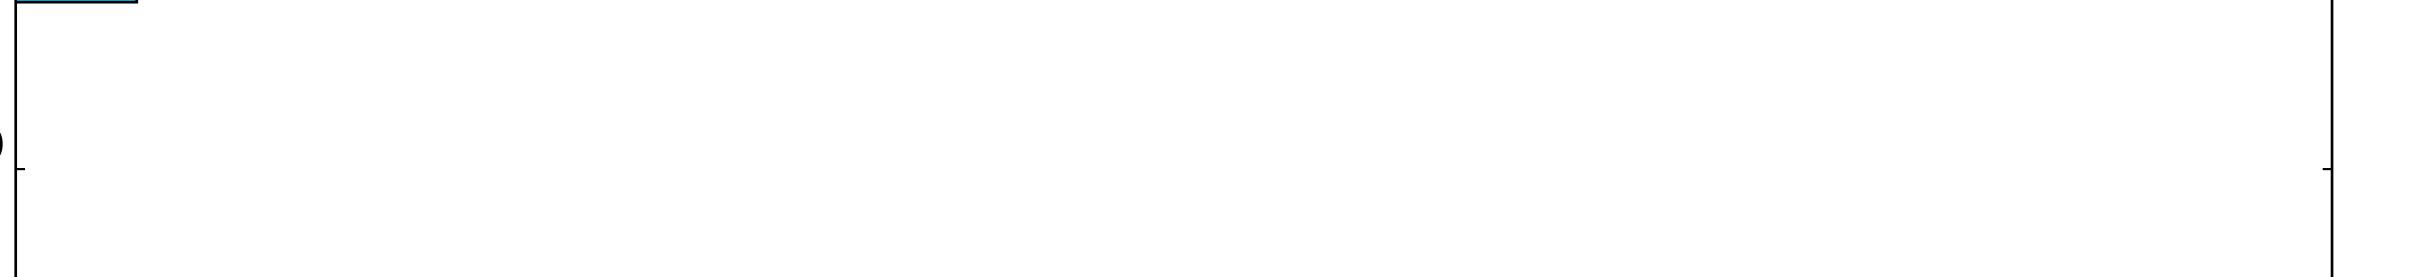

Myosin-V  
(>150  $\mu M$ )

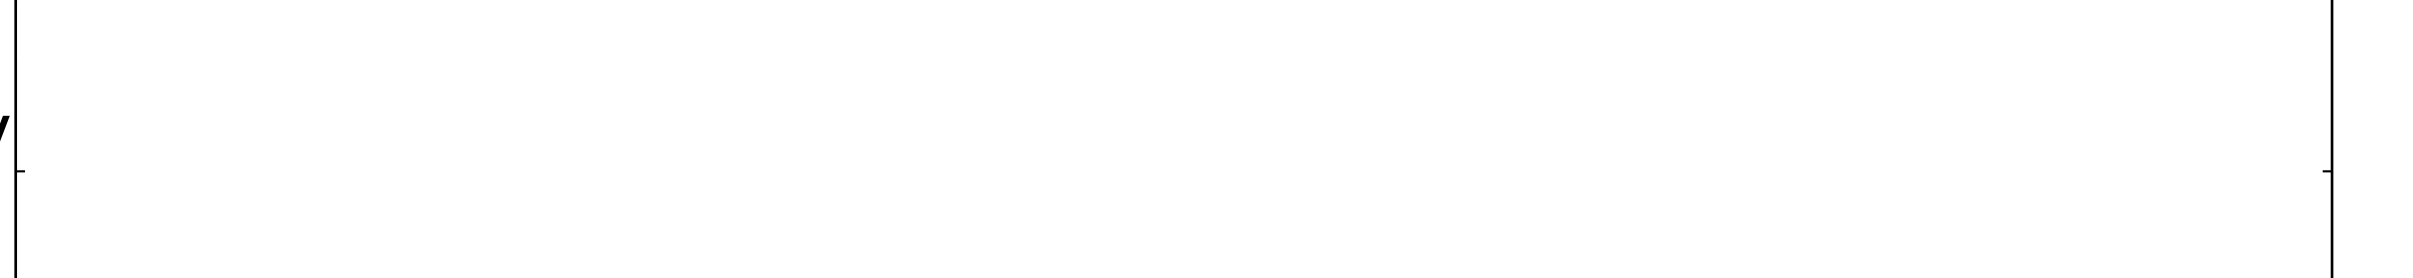

0.00

0.05

0.10

0.15

0.20

0.25

$P_{compatible}$
