# Supplementary figures and images for: Drug specificity and affinity are encoded in the probability of cryptic pocket opening in myosin motor domains
Source: eLife journal article supplement (doi:10.7554/elife.83602), 2023-01-27

## Skeletal Muscle Myosin

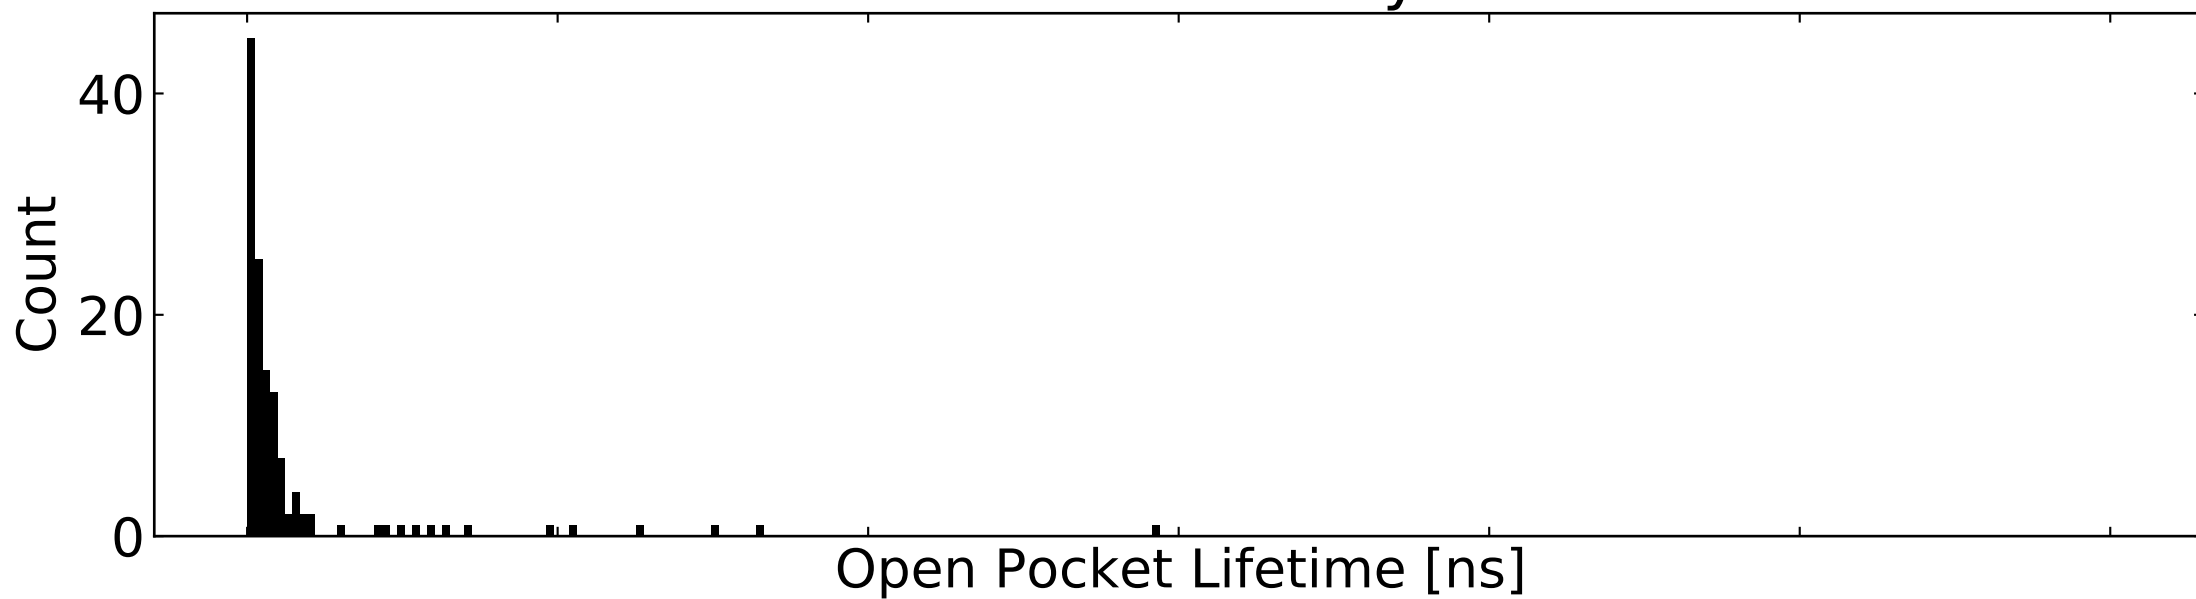

## $\beta$ -Cardiac Myosin

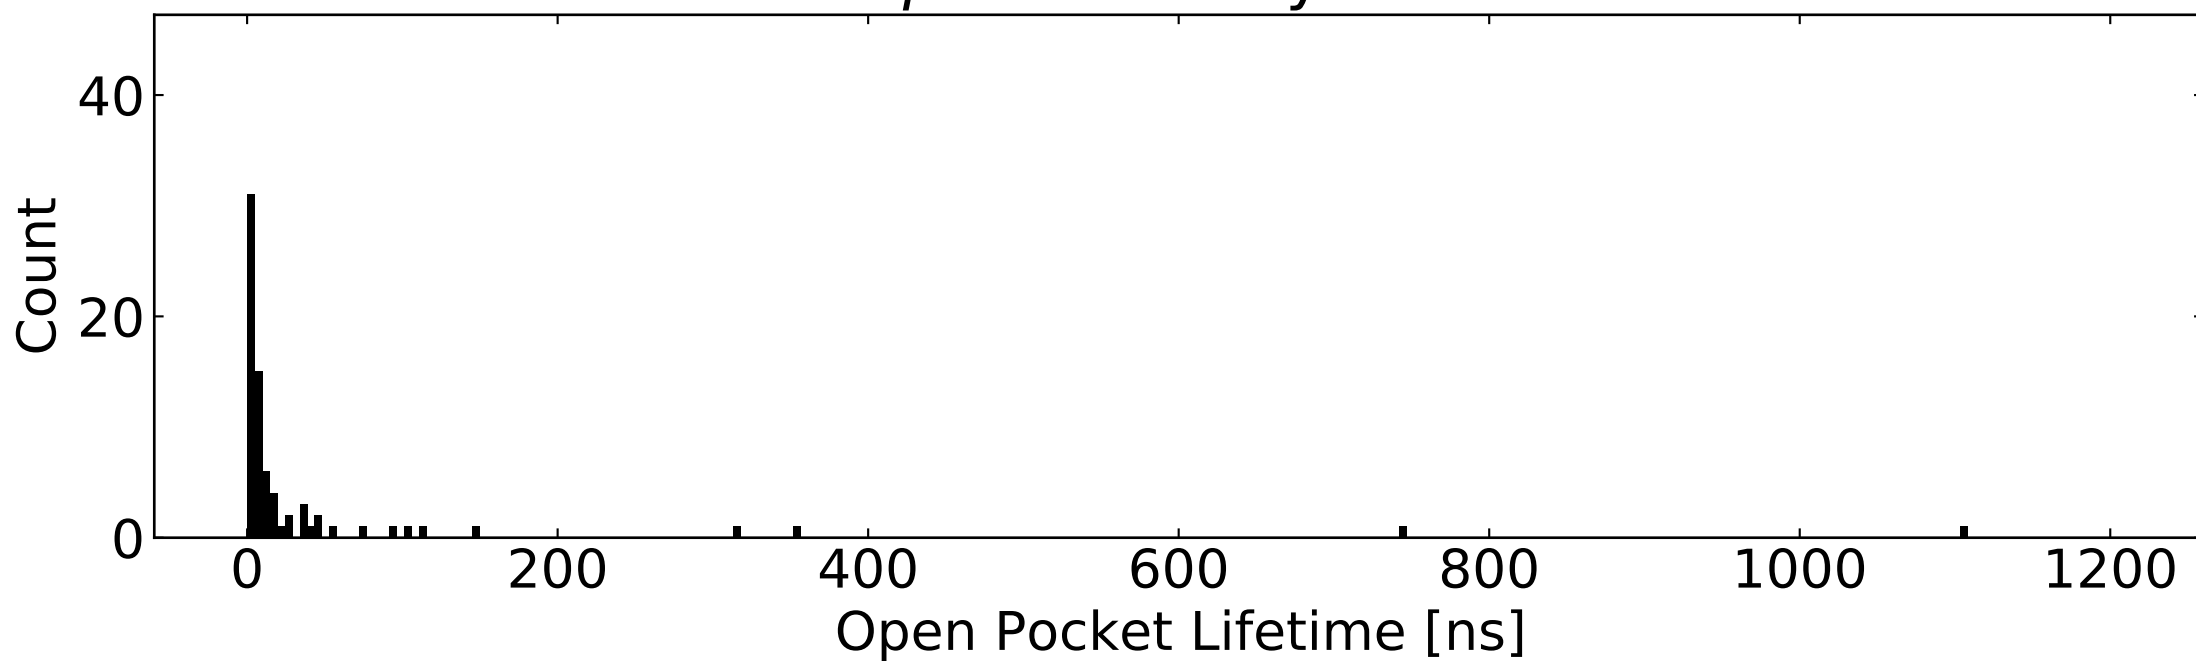

Supplement: supp [file elife-83602-supp-v1.zip]

# Skeletal Muscle Myosin

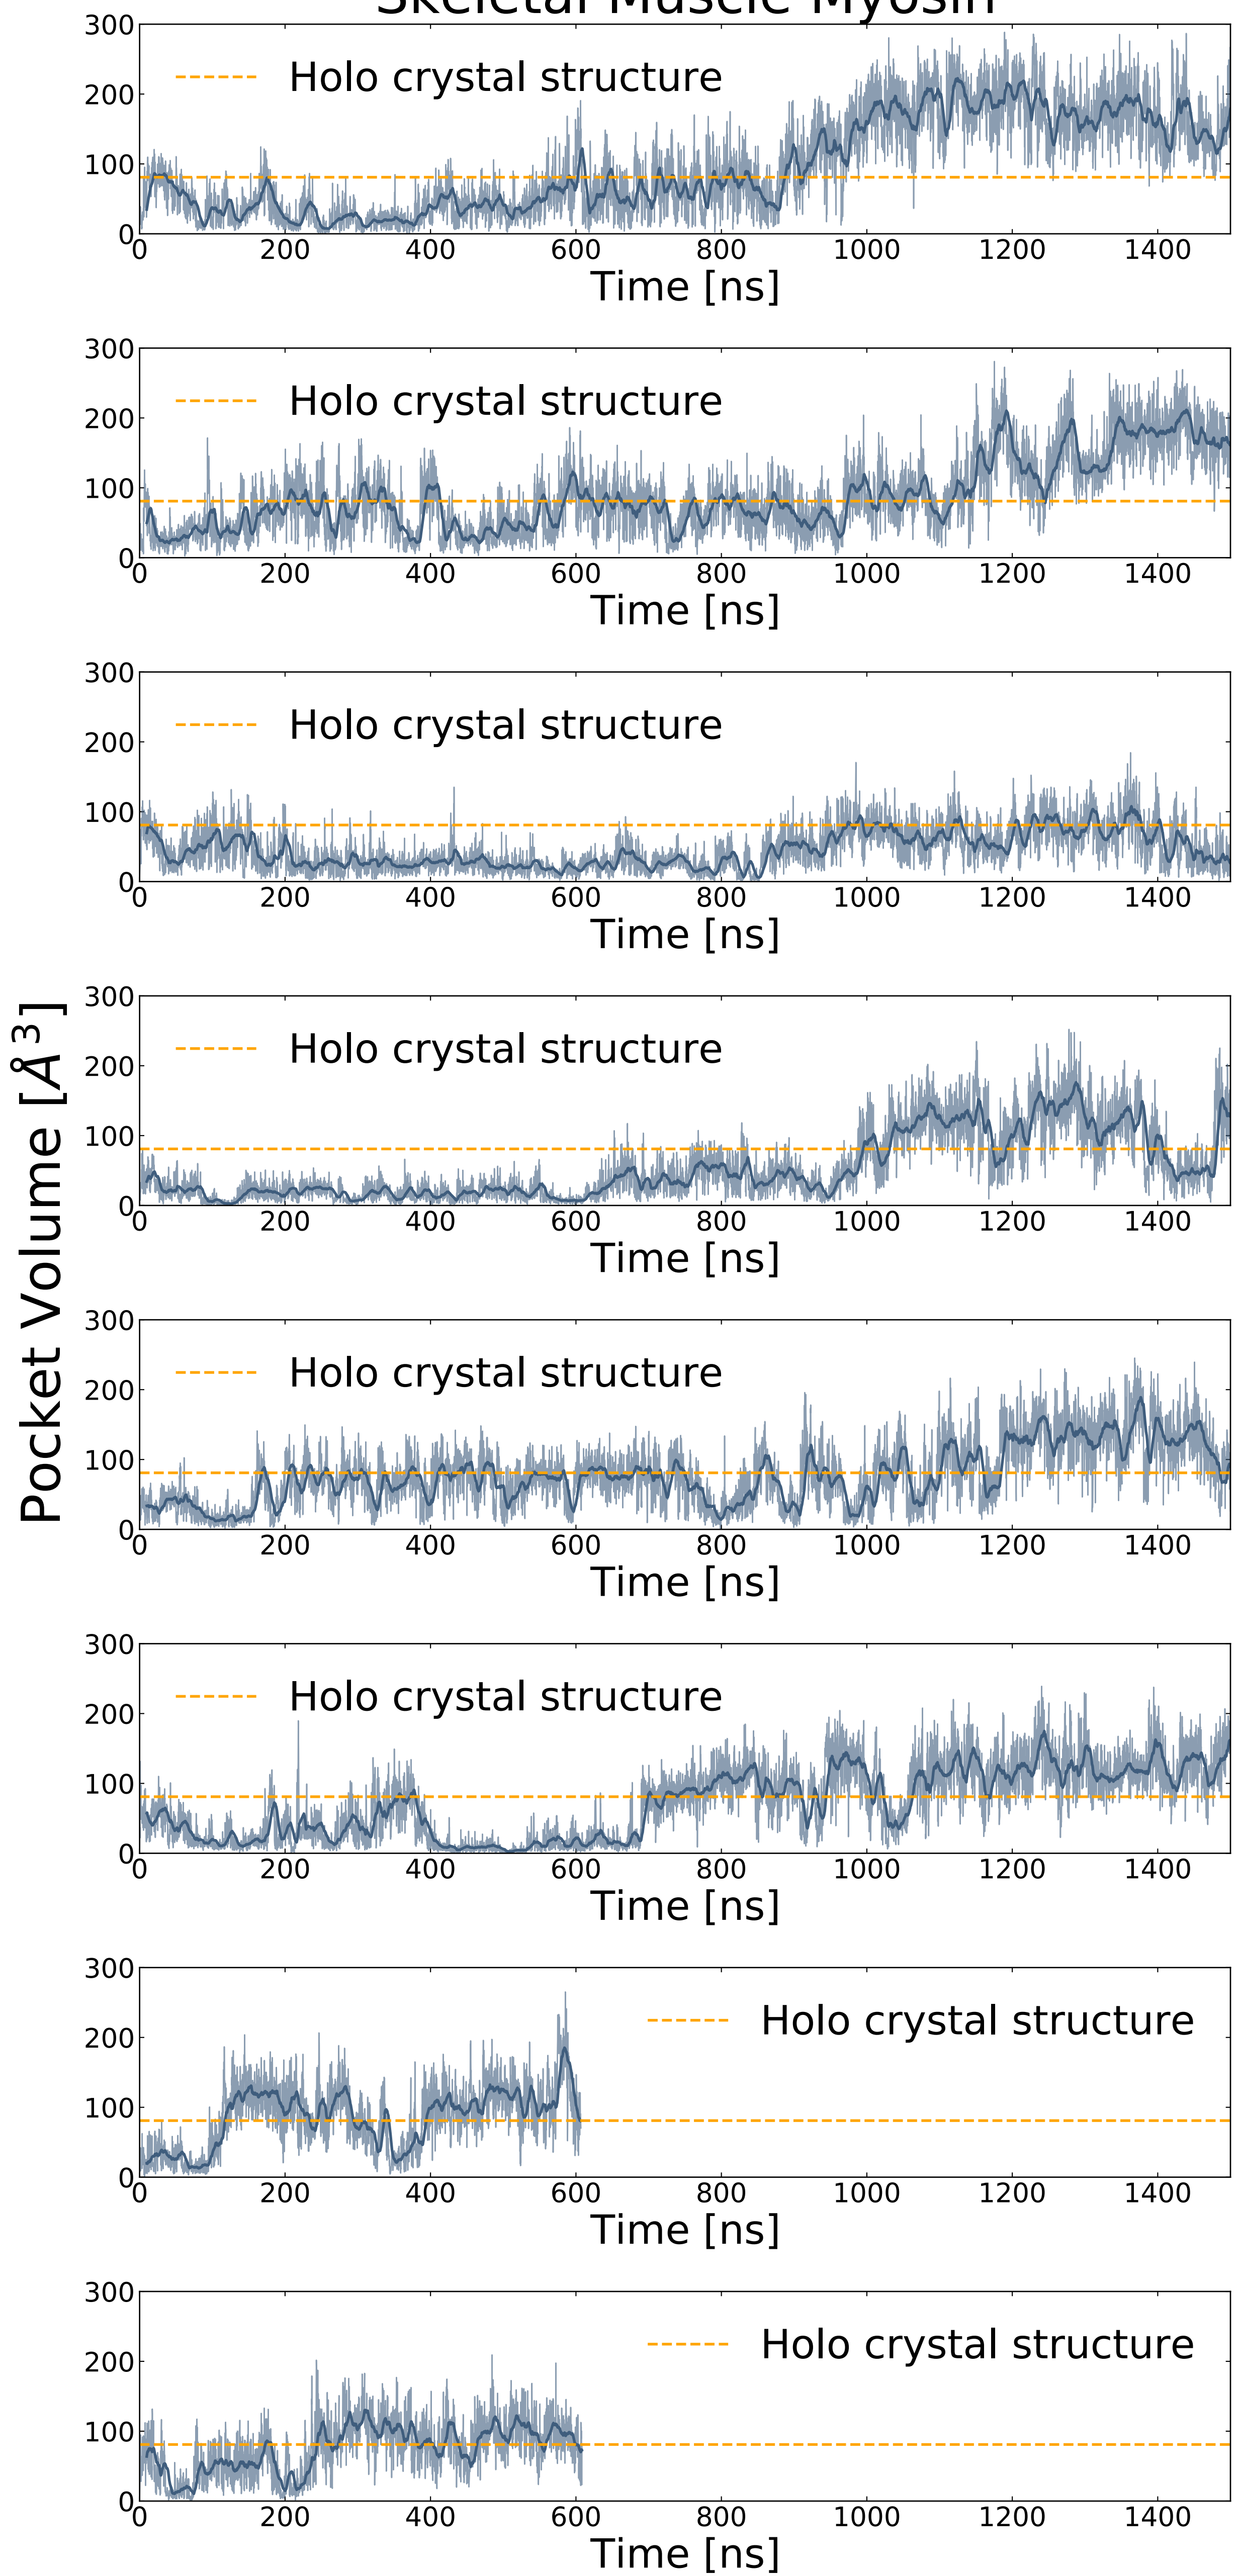

Supplement: supp [file elife-83602-supp-v1.zip]

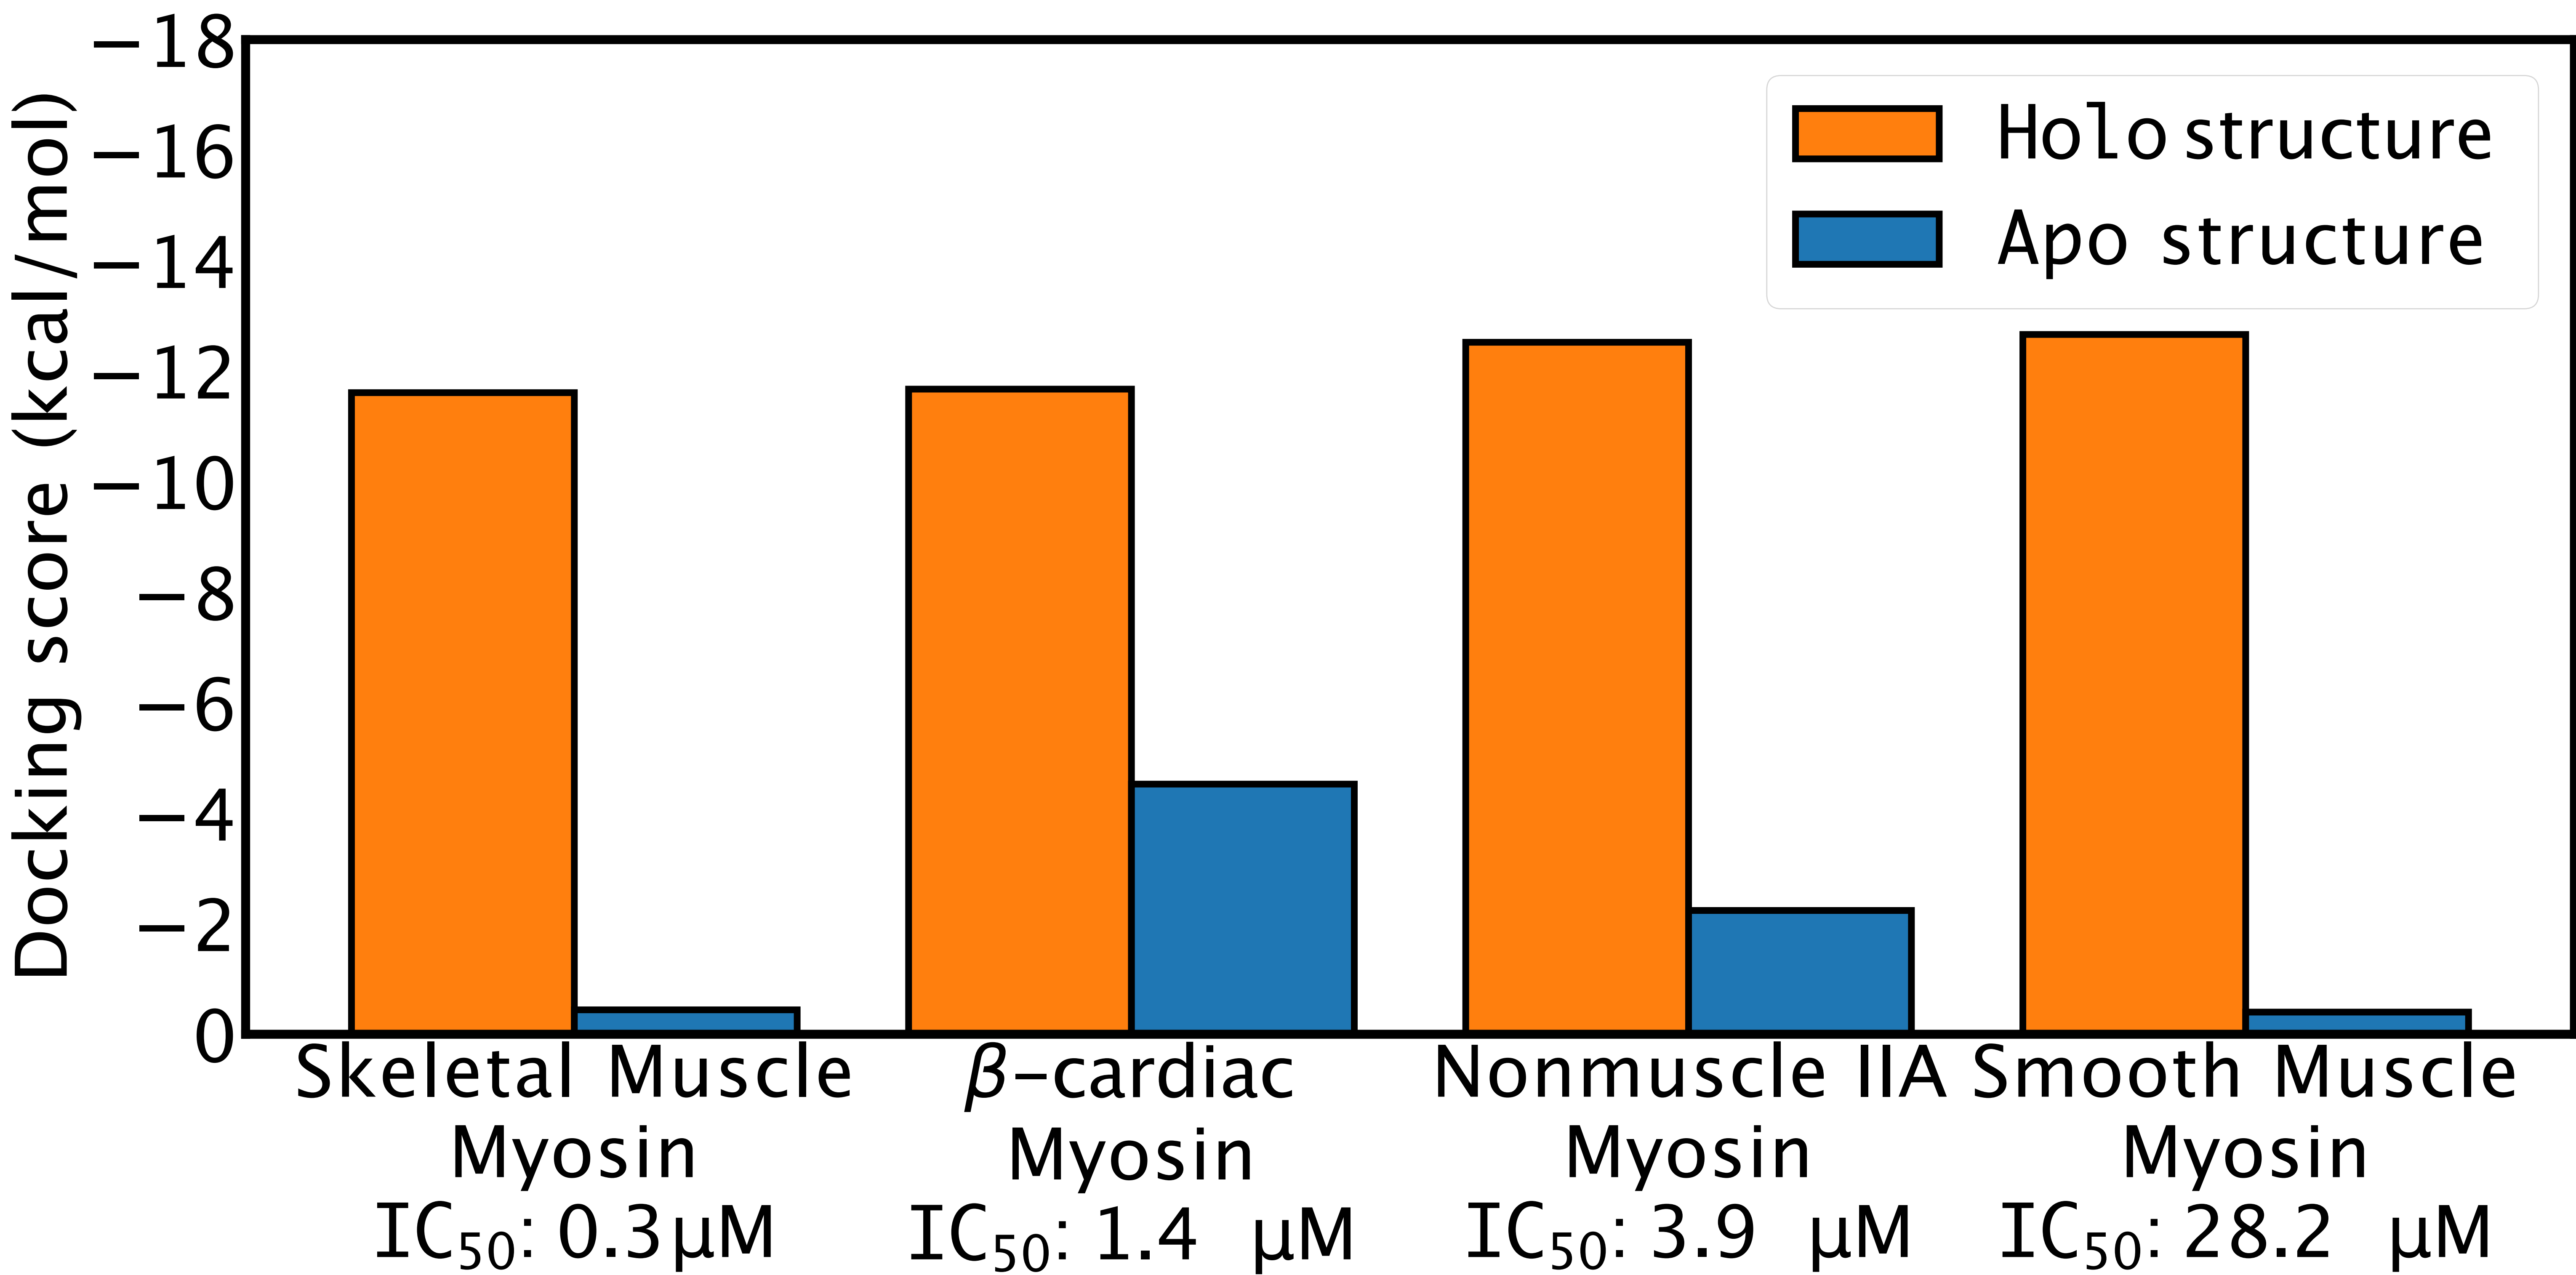

Supplement: supp [file elife-83602-supp-v1.zip]

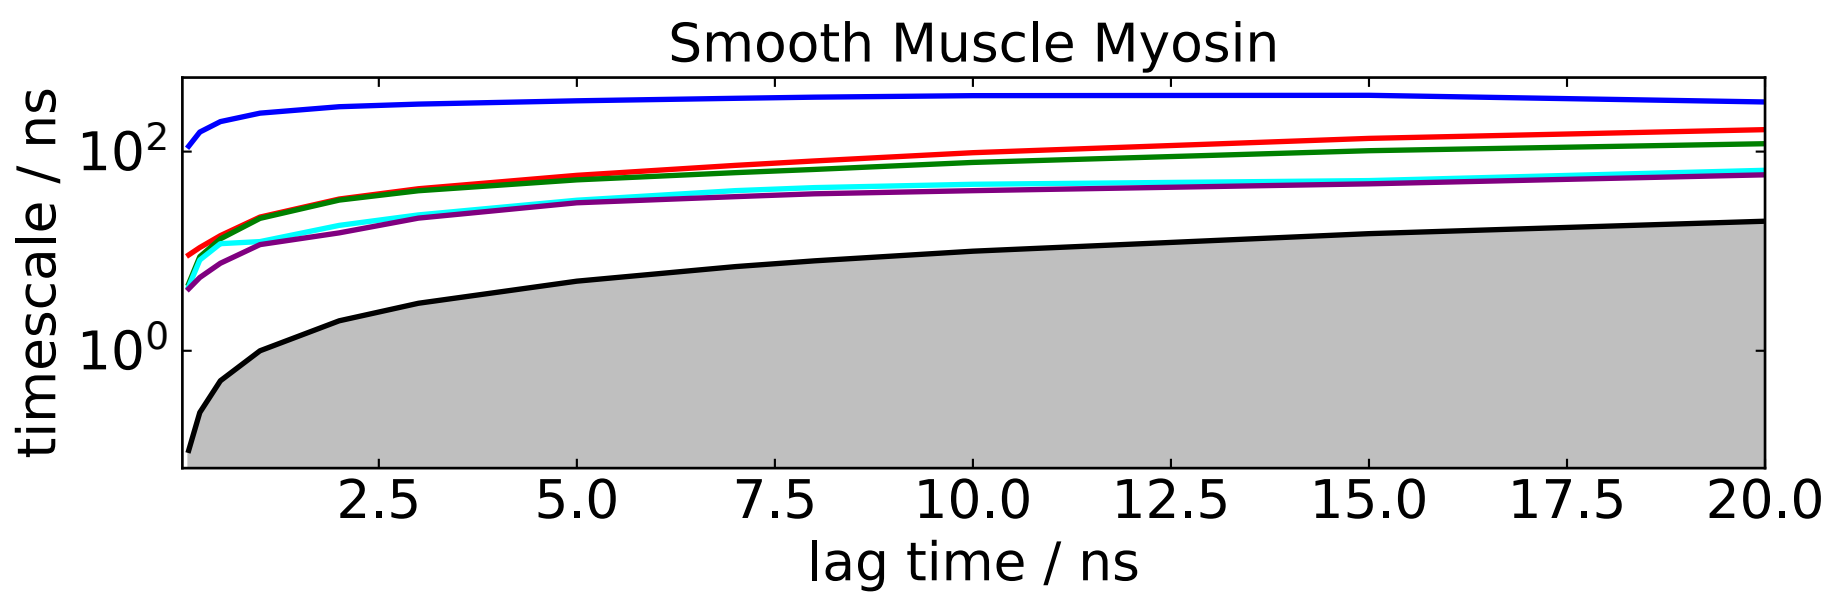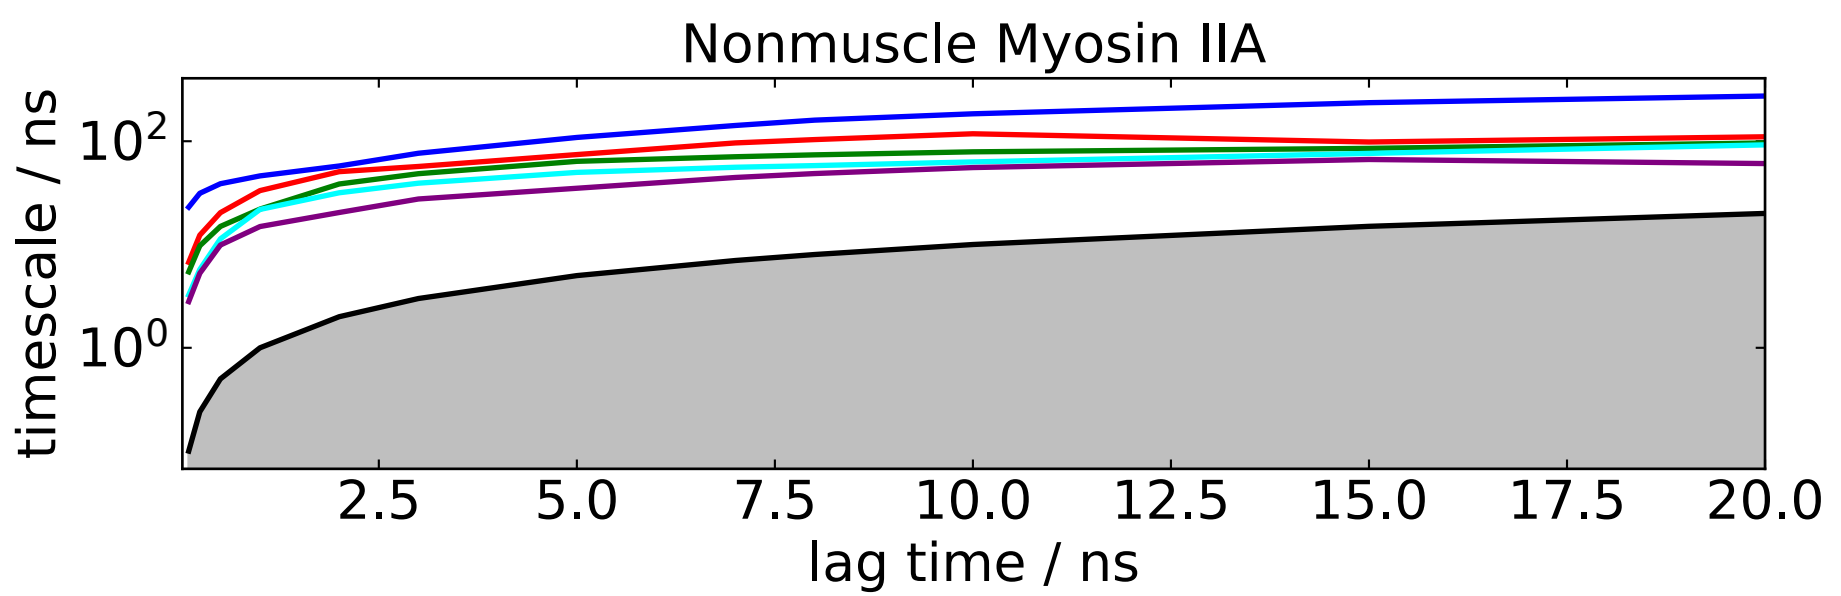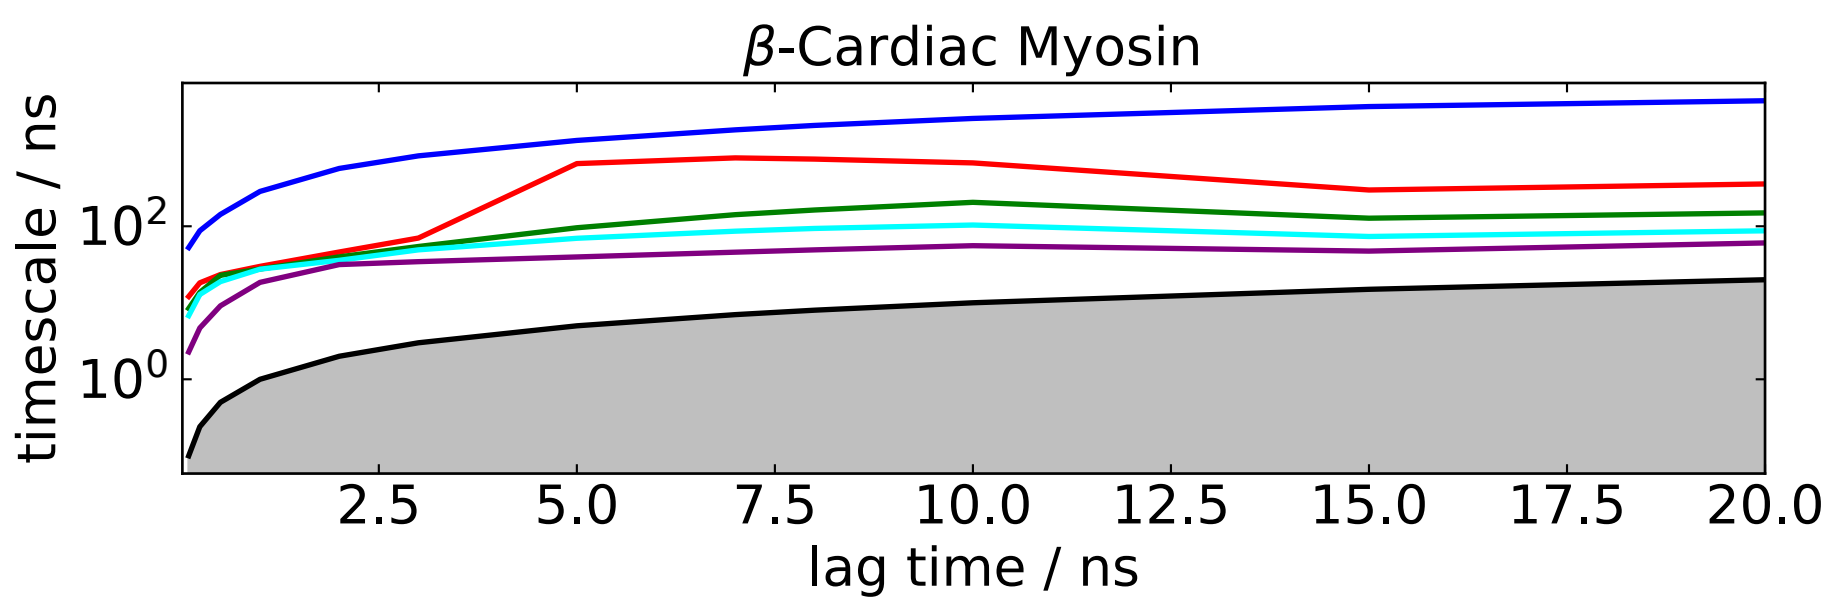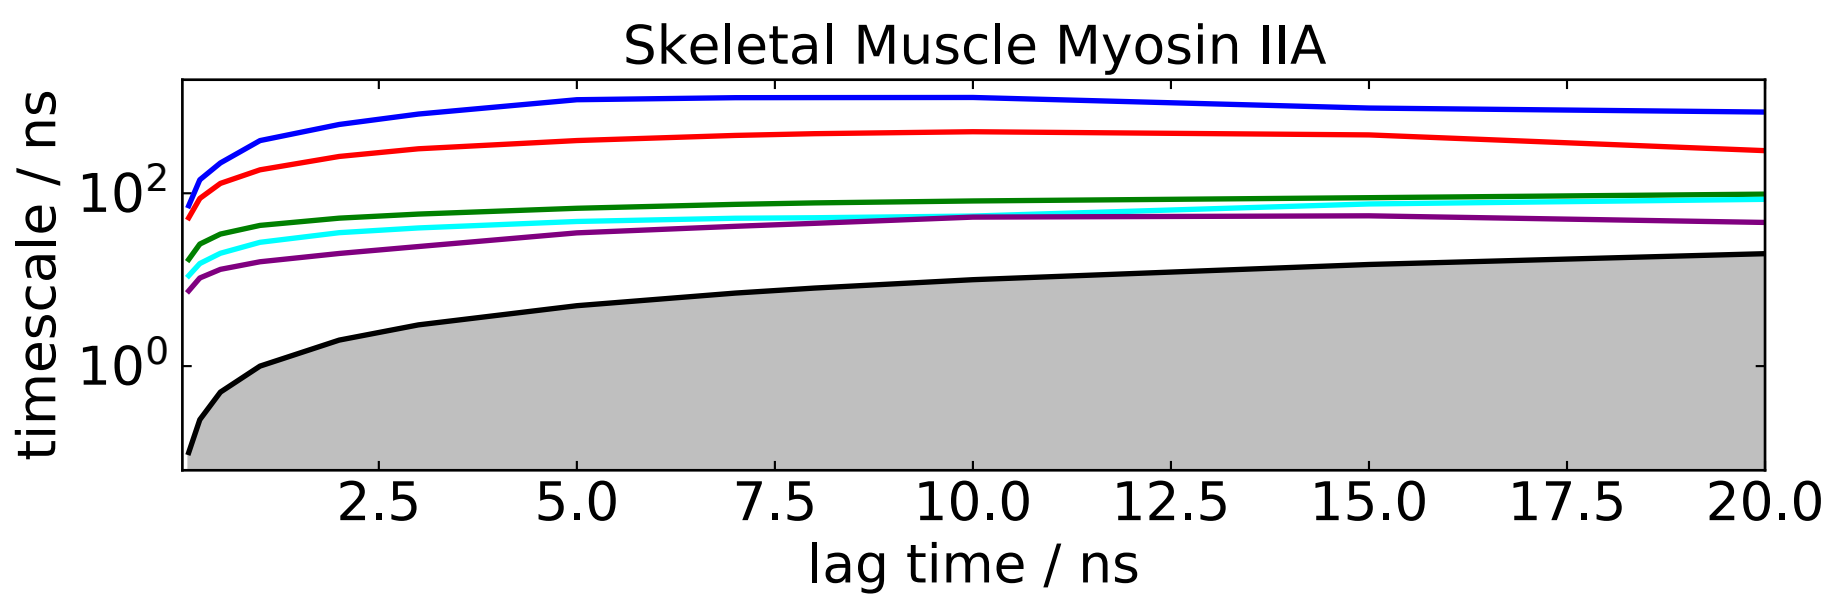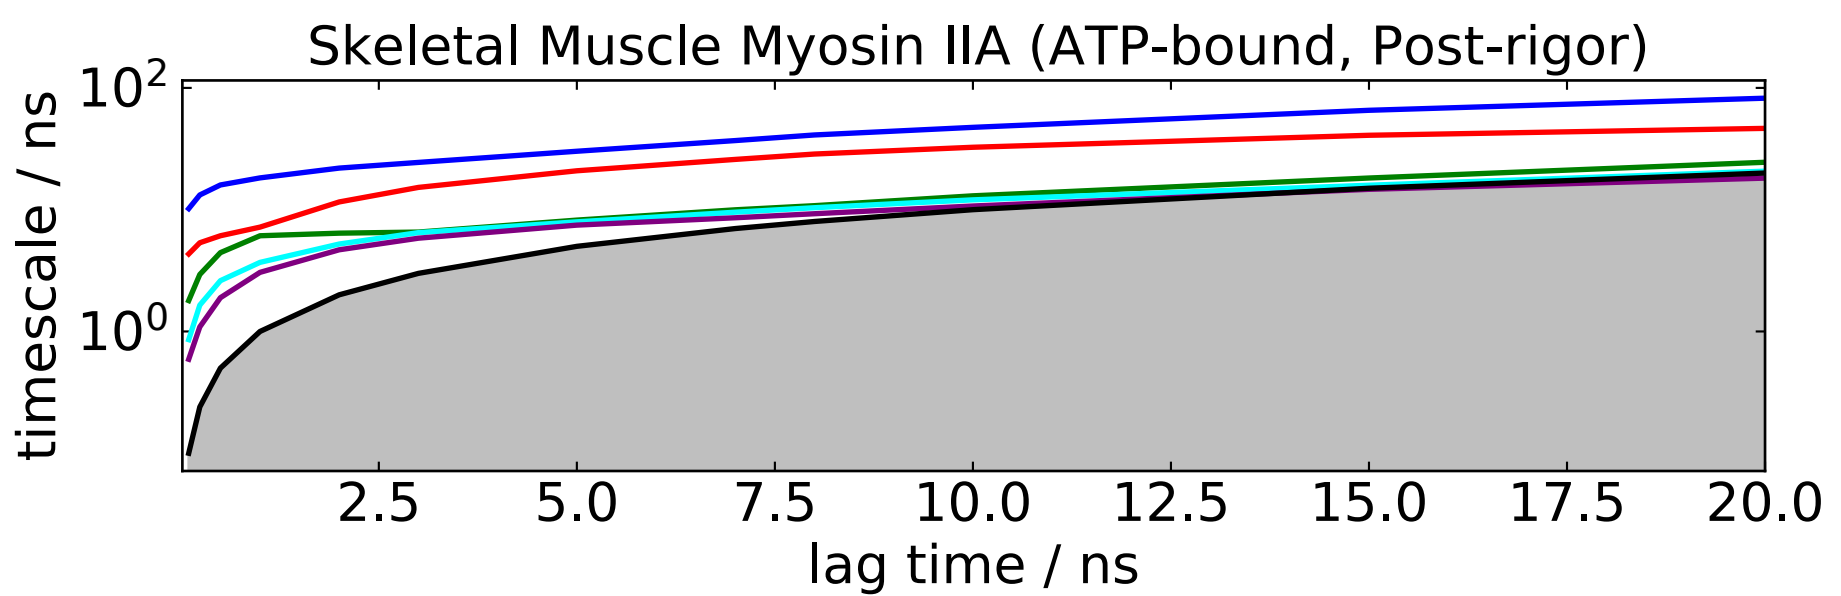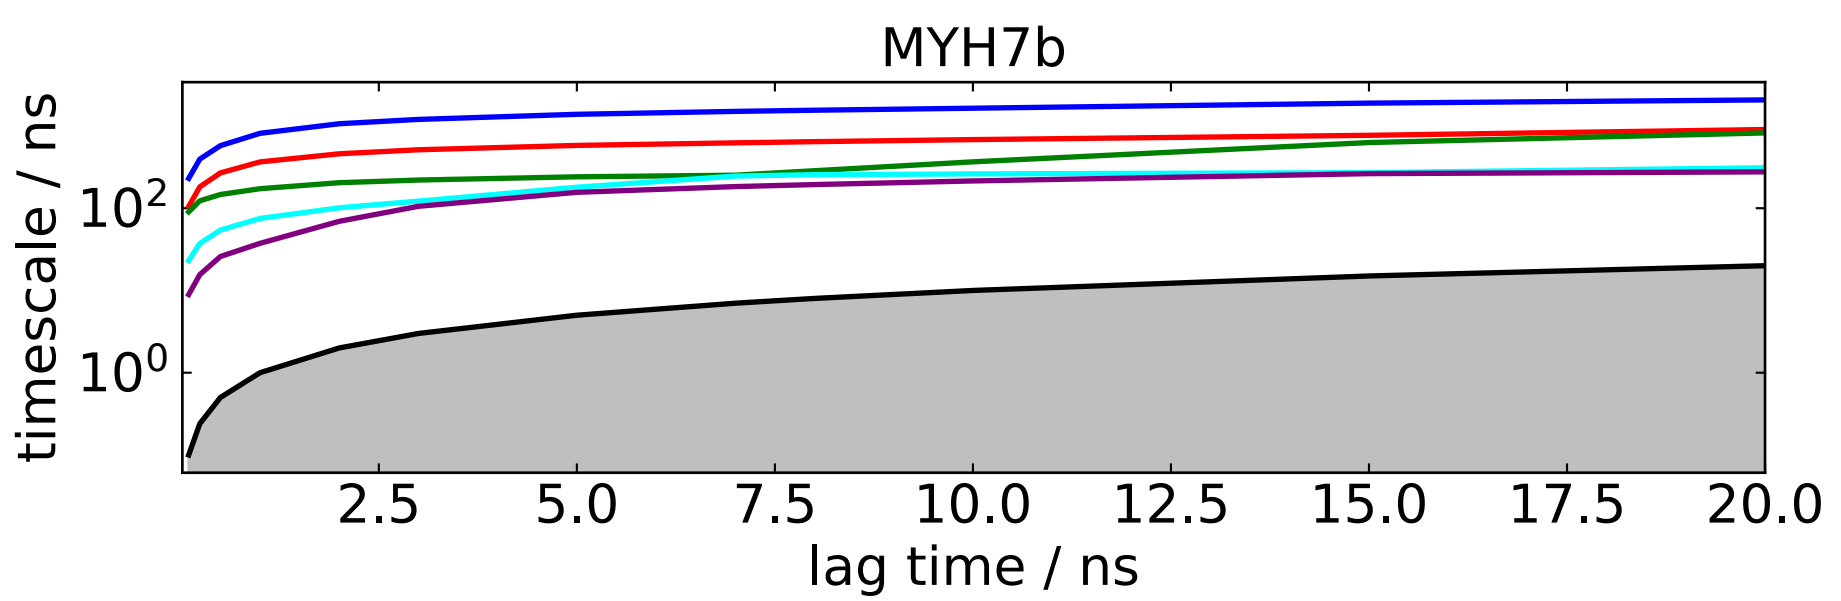

Supplement: supp [file elife-83602-supp-v1.zip]

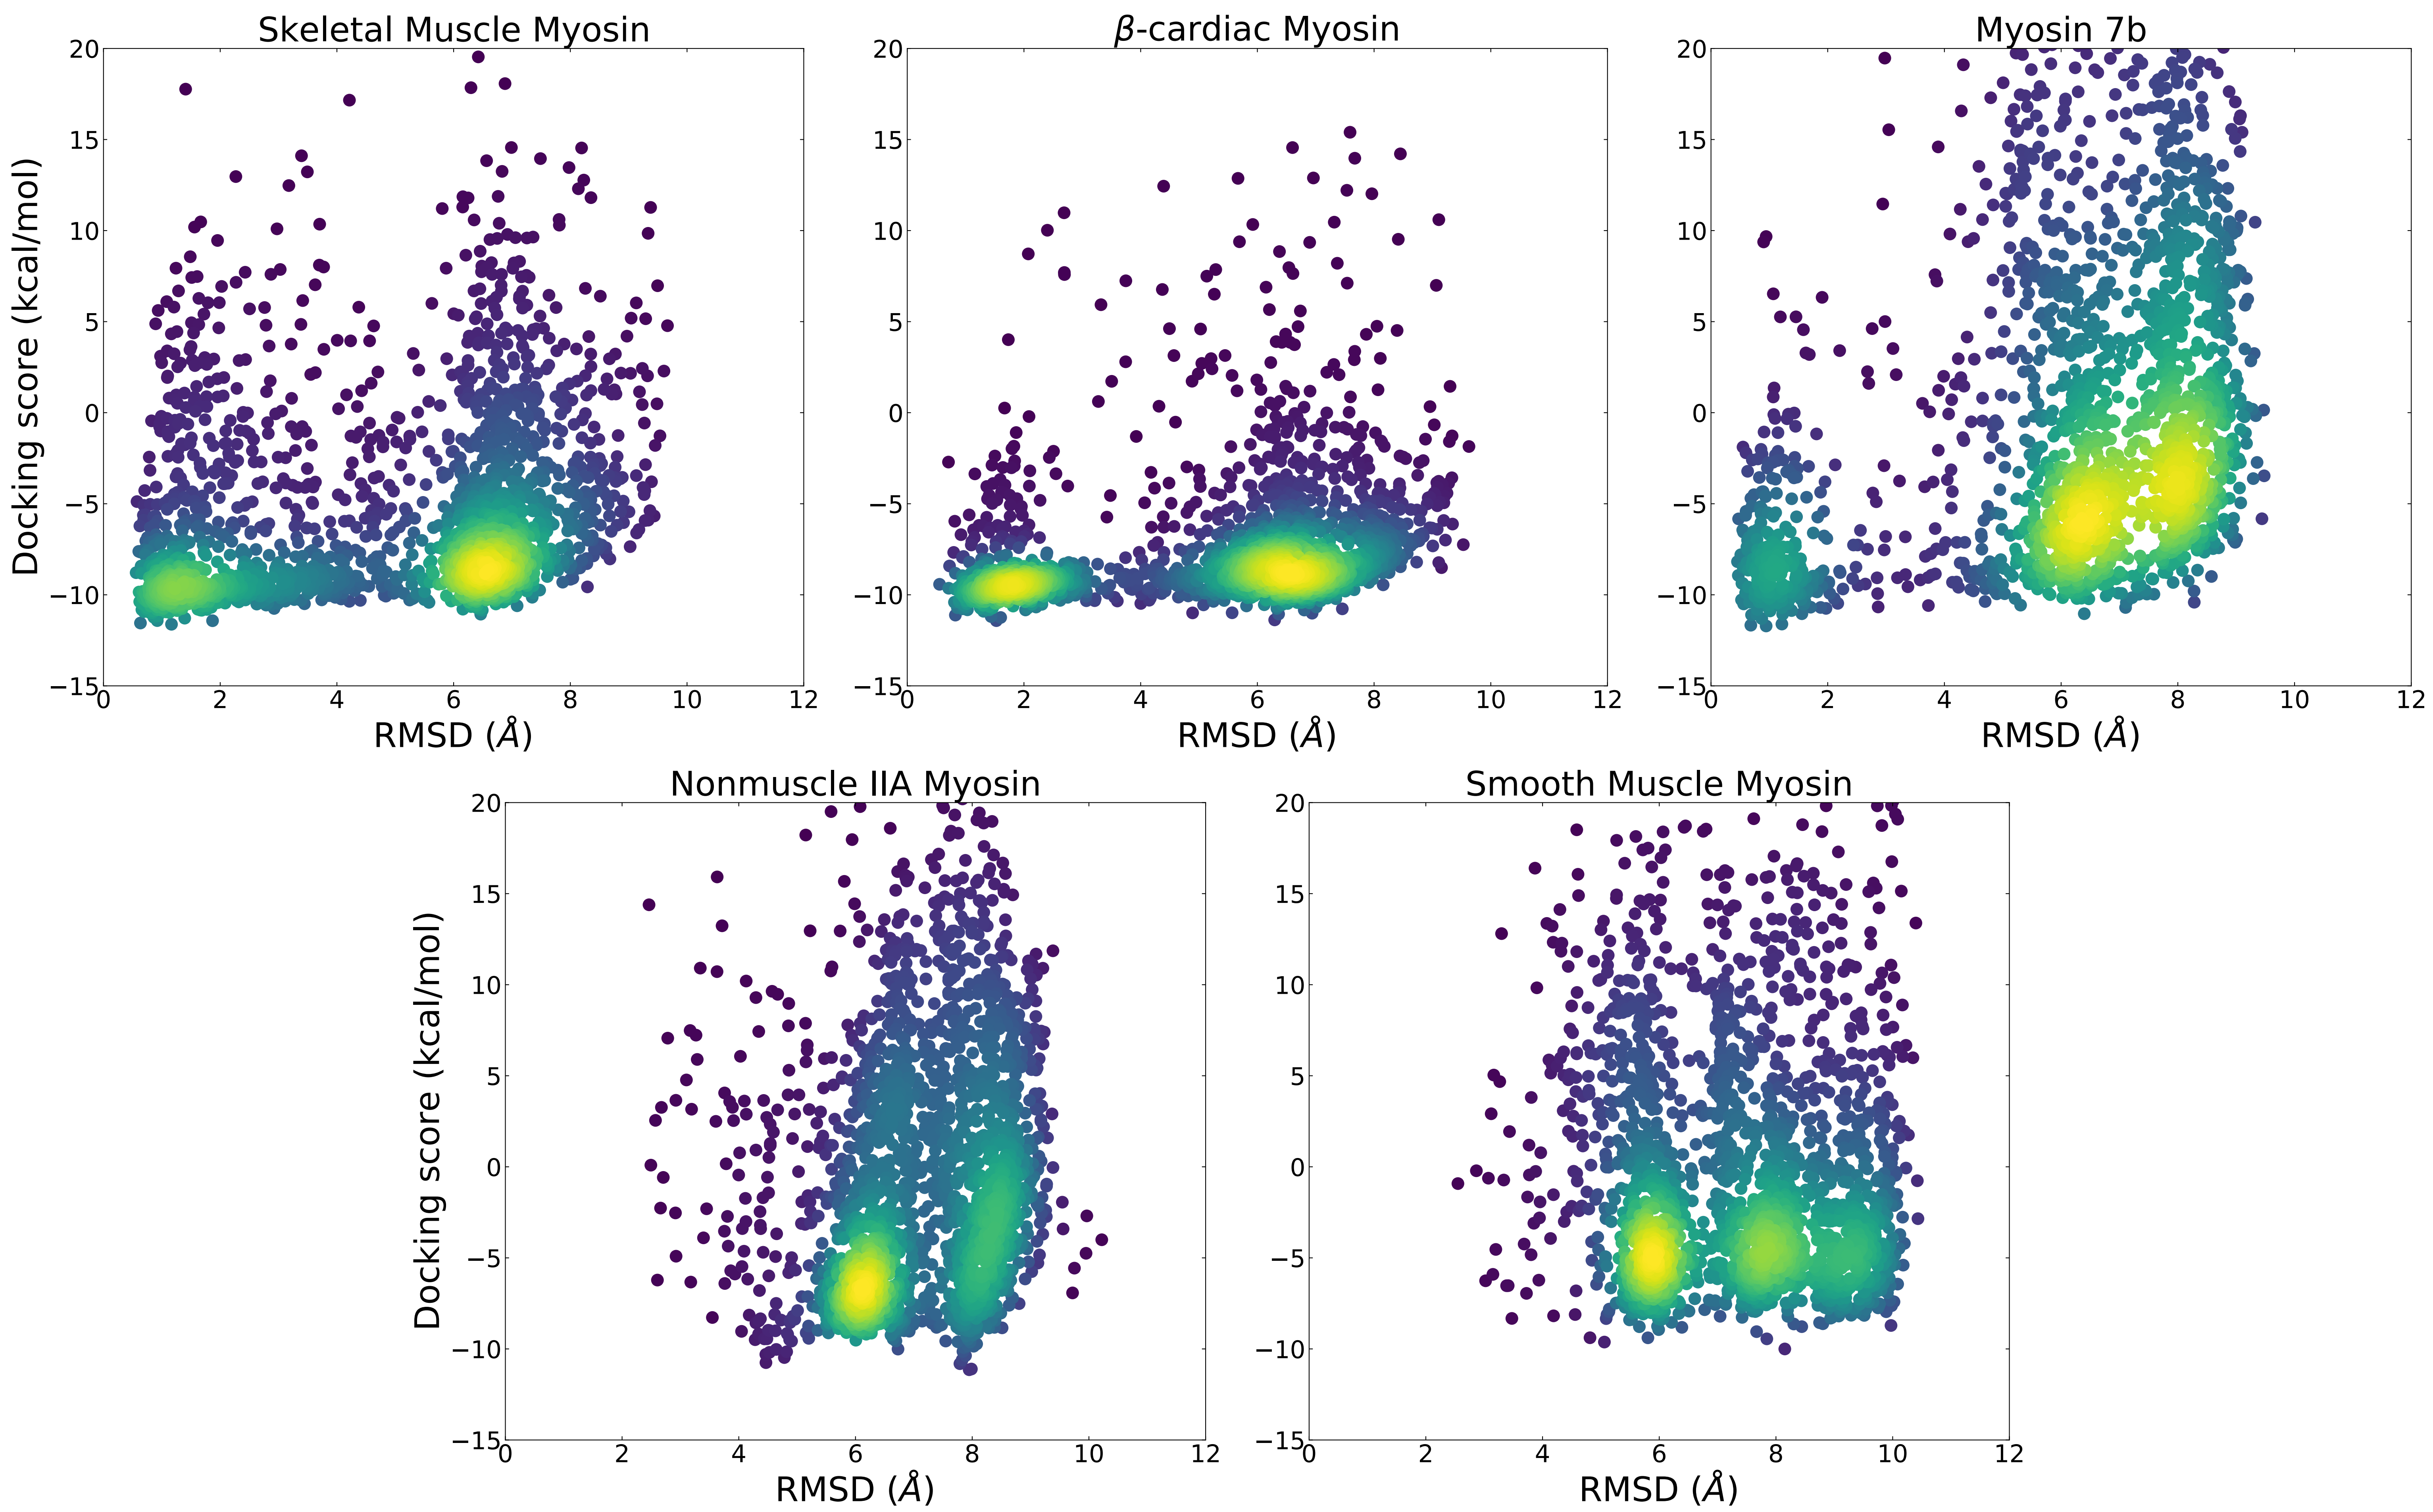

Supplement: supp [file elife-83602-supp-v1.zip]

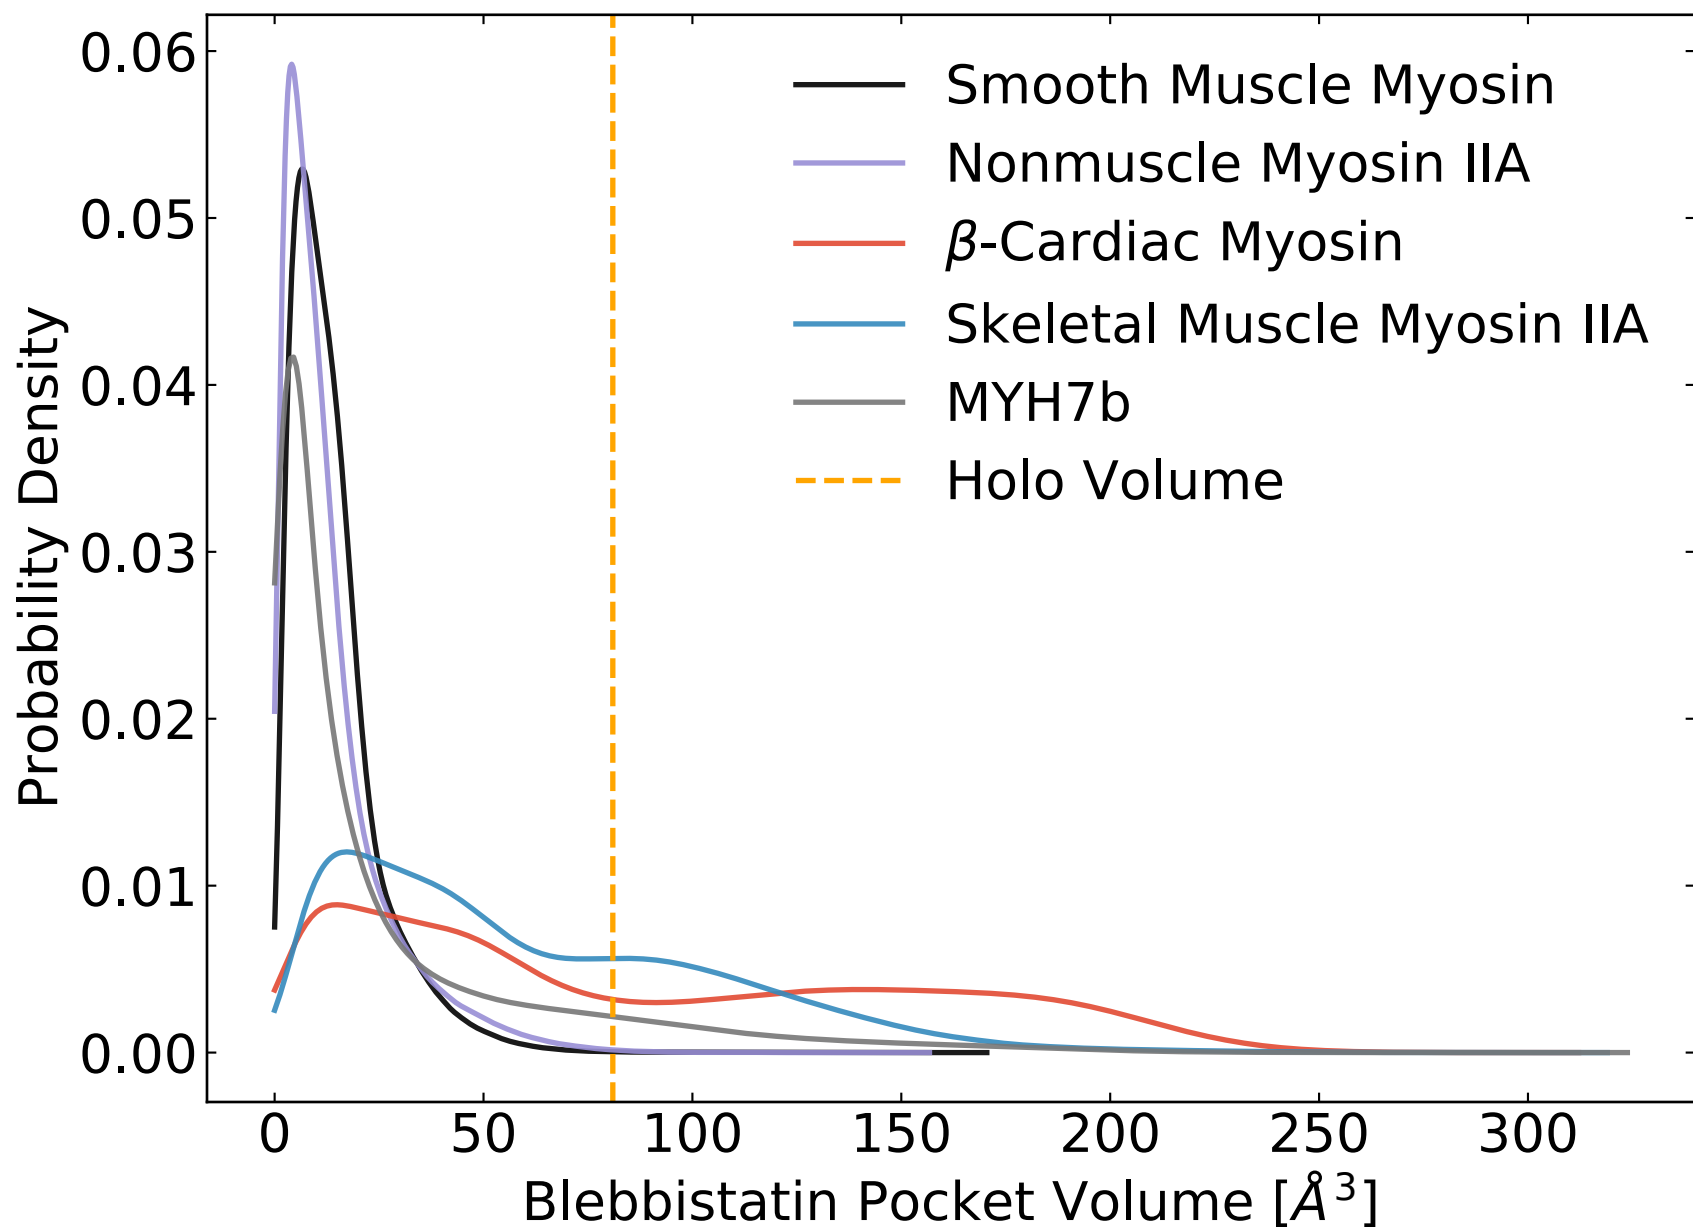

Supplement: supp [file elife-83602-supp-v1.zip]
